# Supplementary material for: Phylogenomic analyses of bat subordinal relationships based on transcriptome data
Source: Springer Nature journal article supplement (doi:10.1038/srep27726), 2016-06-13
Supplement: 41598_2016_BFsrep27726_MOESM40_ESM.pdf [file 41598_2016_BFsrep27726_MOESM40_ESM.pdf]

**Supplementary File**

**Phylogenomic analyses of bat subordinal relationships based on  
transcriptome data**

Ming Lei<sup>1</sup> and Dong Dong<sup>1\*</sup>

<sup>1</sup> Laboratory of Molecular Ecology and Evolution, Institute of Estuarine and Coastal Research, East China Normal University, Shanghai, 200062, China

\*To whom correspondence should be addressed. Email: [ddong.ecnu@gmail.com](mailto:ddong.ecnu@gmail.com)

**Figure S1** Phylogenetic tree based on coalescent analyses

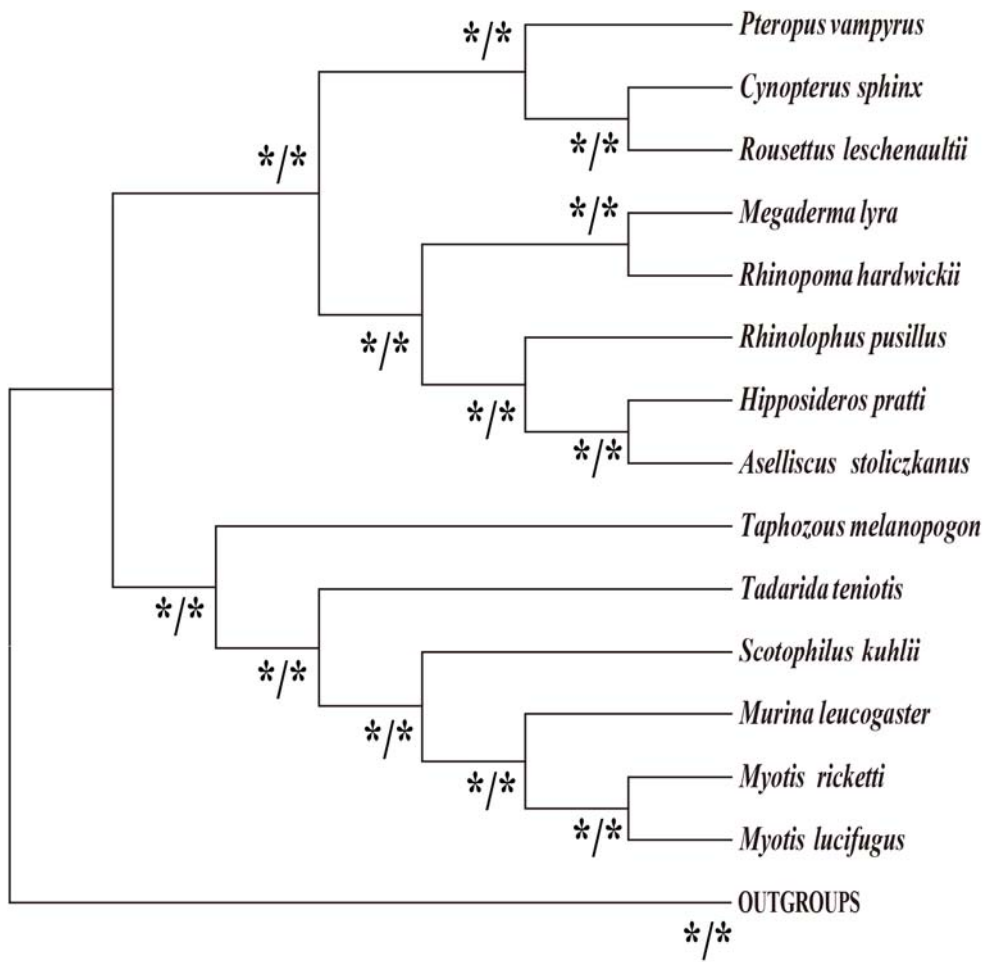

**Figure S2** Phylogenetic tree based on concatenated analyses

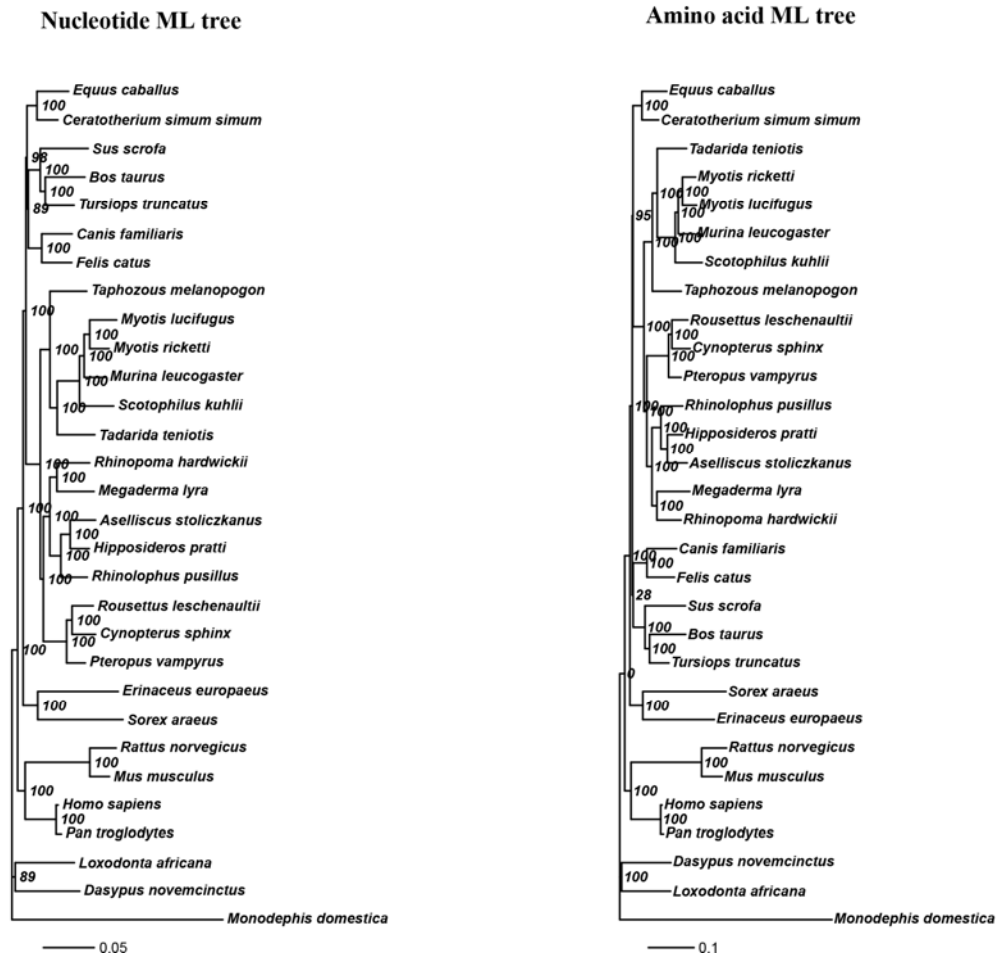

**Table S1** List of species in our study

| Scientific name                  | Common name                     | Order           | Family           |
|----------------------------------|---------------------------------|-----------------|------------------|
| <i>Cynopterus sphinx</i>         | Greater Short-nosed Fruit Bat   | Chiroptera      | Pteropodidae     |
| <i>Rousettus leschenaultii</i>   | Fulvous Fruit Bat               | Chiroptera      | Pteropodidae     |
| <i>Aselliscus stoliczkanus</i>   | Stoliczka's Trident Bat         | Chiroptera      | Hipposideridae   |
| <i>Hipposideros pratti</i>       | Pratt's Roundleaf Bat           | Chiroptera      | Hipposideridae   |
| <i>Rhinolophus pusillus</i>      | Least Horseshoe Bat             | Chiroptera      | Rhinolophidae    |
| <i>Megaderma lyra</i>            | Greater False Vampire Bat       | Chiroptera      | Megadermatidae   |
| <i>Rhinopoma hardwickii</i>      | Lesser mouse-tailed bat         | Chiroptera      | Rhinopomatidae   |
| <i>Taphozous melanopogon</i>     | Black-bearded Tomb Bat          | Chiroptera      | Emballonuridae   |
| <i>Tadarida teniotis</i>         | European free-tailed bat        | Chiroptera      | Molossidae       |
| <i>Murina leucogaster</i>        | Greater Tube-nosed Bat          | Chiroptera      | Vespertilionidae |
| <i>Myotis ricketti</i>           | Rickett's big-footed bat        | Chiroptera      | Vespertilionidae |
| <i>Scotophilus kuhlii</i>        | Lesser Asiatic Yellow House Bat | Chiroptera      | Vespertilionidae |
| <i>Pteropus vampyrus</i>         | Large flying fox                | Chiroptera      | Pteropodidae     |
| <i>Myotis lucifugus</i>          | Little brown bat                | Chiroptera      | Vespertilionidae |
| <i>Equus caballus</i>            | Horse                           | Perissodactyla  | Equidae          |
| <i>Ceratotherium simum simum</i> | Rhinoceros                      | Perissodactyla  | Rhinocerotidae   |
| <i>Bos taurus</i>                | Cow                             | Cetartiodactyla | Bovidae          |
| <i>Sus scrofa</i>                | Pig                             | Cetartiodactyla | Suidae           |
| <i>Tursiops truncatus</i>        | Dolphin                         | Cetartiodactyla | Delphinidae      |
| <i>Canis familiaris</i>          | Dog                             | Carnivoa        | Canidae          |
| <i>Felis catus</i>               | Cat                             | Carnivoa        | Felidae          |
| <i>Erinaceus europaeus</i>       | Hedgehog                        | Eulipotyphyla   | Erinaceidae      |
| <i>Sorex araeus</i>              | Shrew                           | Eulipotyphyla   | Soricidae        |
| <i>Mus musculus</i>              | Mouse                           | Rodentia        | Muridae          |
| <i>Rattus norvegicus</i>         | Rat                             | Rodentia        | Muridae          |
| <i>Homo sapiens</i>              | Human                           | Primates        | Hominidae        |
| <i>Pan troglodytes</i>           | chimpanzee                      | Primates        | Hominidae        |
| <i>Loxodonta africana</i>        | Elephant                        | Proboscidea     | Elephantidae     |
| <i>Dasypus novemcinctus</i>      | Armadillo                       | Cingulata       | Dasypodidae      |
| <i>Monodelphis domestica</i>     | Opossum                         | Didephimorphia  | Didelphidae      |
